# Supplementary material for: Specificity, synergy, and mechanisms of splice-modifying drugs
Source: PubMed Central journal article supplement (PMC10904865; doi:10.1038/s41467-024-46090-5), 2024-02-29
Supplement: 41467_2024_46090_MOESM3_ESM.pdf [file 41467_2024_46090_MOESM3_ESM.pdf]

# Inventory of Supporting Information

Manuscript #: NCOMMS-23-08099A

Corresponding author name(s): Adrian R. Krainer, Justin B. Kinney

## 1. Supplementary Information

### A. PDF Files

| Item                      | Present? | Filename<br>Whole original file name including extension. i.e.: Smith_SI.pdf.<br>The extension must be .pdf | A brief, numerical description of file contents.<br>i.e.: <i>Supplementary Figures 1-4, Supplementary Discussion, and Supplementary Tables 1-4.</i>                                                                                        |
|---------------------------|----------|-------------------------------------------------------------------------------------------------------------|--------------------------------------------------------------------------------------------------------------------------------------------------------------------------------------------------------------------------------------------|
| Supplementary Information | Yes      | 22_drugs_v18_si.pdf                                                                                         | Experimental methods, Data processing, exploratory analysis, and molecular dynamics simulations, Mathematical model definitions, Bayesian model inference, Supplemental Tables S1-S4, Supplemental Figures S1-S14, Supplemental References |
| Reporting Summary         | Yes      | v18_reporting_summary.pdf                                                                                   |                                                                                                                                                                                                                                            |
| Peer Review Information   | No       | <i>OFFICE USE ONLY</i>                                                                                      |                                                                                                                                                                                                                                            |

## 3. Source Data

| Parent Figure or Table             | Filename<br>Whole original file name including extension. i.e.:<br><i>Smith_SourceData_Fig1.xls, or Smith_Unmodified_Gels_Fig1.pdf</i> | Data description<br>i.e.: Unprocessed western Blots and/or gels, Statistical Source Data, etc. |
|------------------------------------|----------------------------------------------------------------------------------------------------------------------------------------|------------------------------------------------------------------------------------------------|
| Supplementary Information Fig. S1I | supporting_data_fig_S1I_uncropped.jpg                                                                                                  | Uncropped radioactive RT-PCR gel image                                                         |
